# Supplementary material for: Validity and Usage of the Seasonal Pattern Assessment Questionnaire (SPAQ) in a French Population of Patients with Depression, Bipolar Disorders and Controls
Source: MDPI journal article supplement (doi:10.3390/jcm10091897), 2021-04-27
Supplement: s1 [file s1]

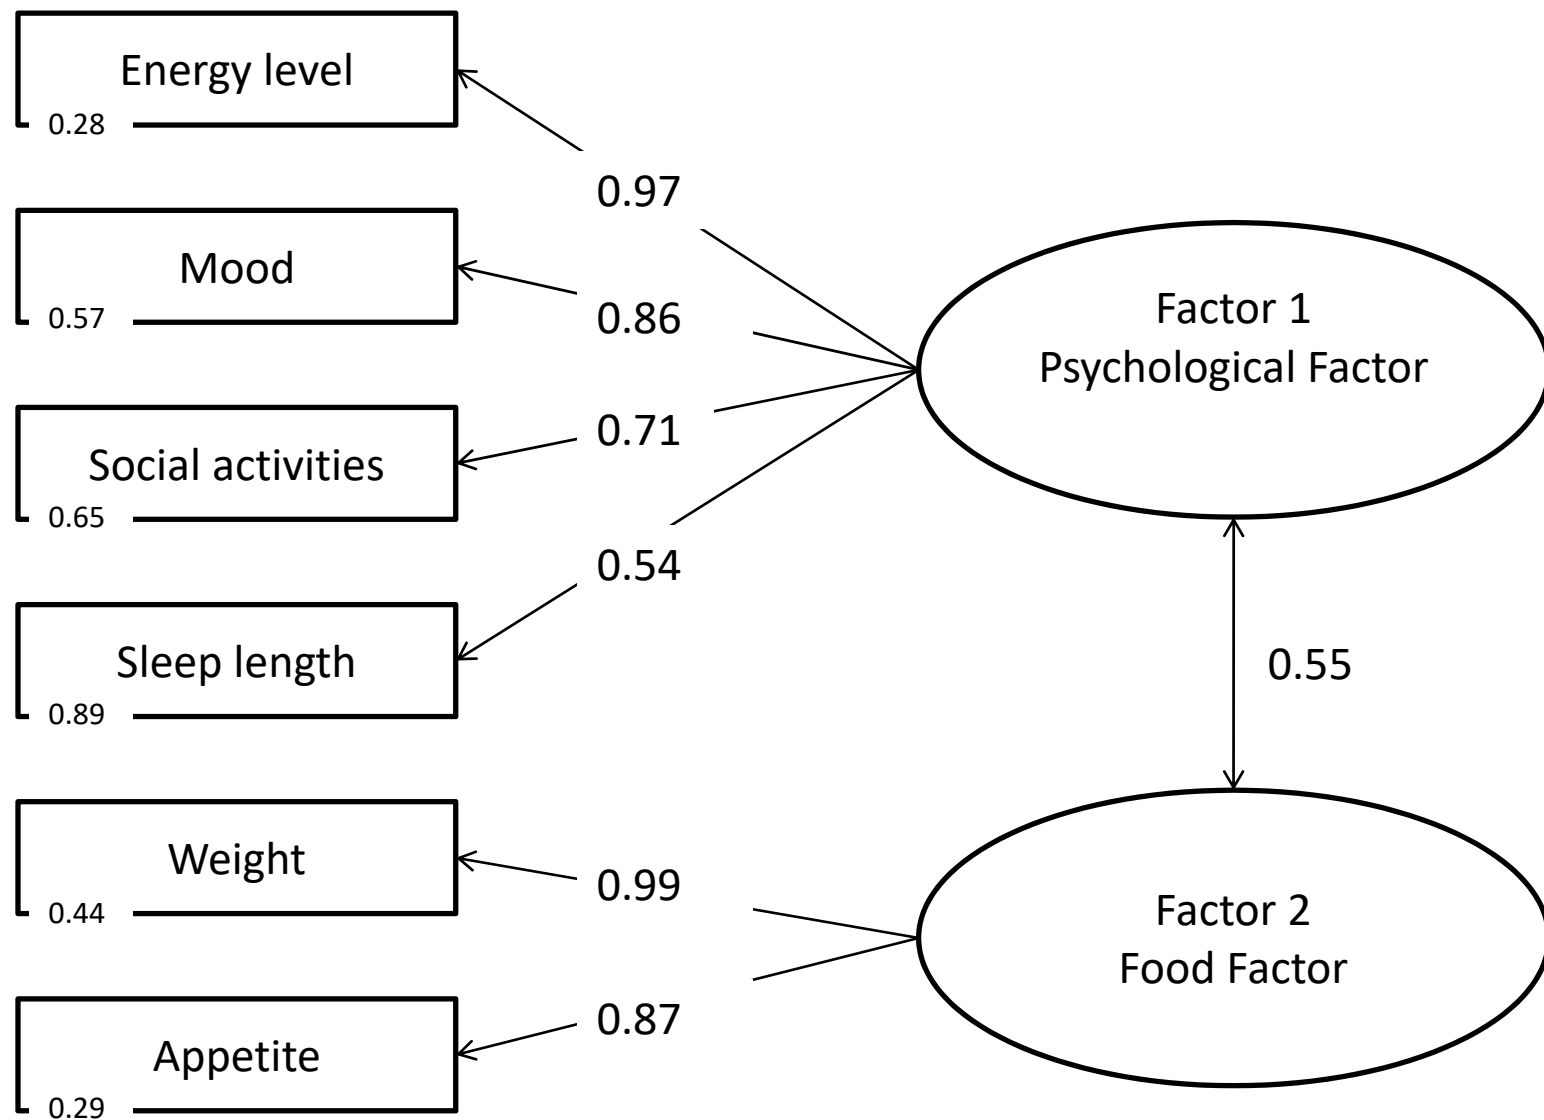

**Figure S1.** Path diagram of the confirmatory factor analysis of the General Seasonality Score (Seasonal Pattern Assessment Questionnaire – SPAQ).

The single-headed arrows are the factor loadings of each dimension, the double-headed arrow is the covariance between the two factors and the number assigned to each dimension is the corresponding residual covariance.
