# Supplementary material for: Validity and Usage of the Seasonal Pattern Assessment Questionnaire (SPAQ) in a French Population of Patients with Depression, Bipolar Disorders and Controls
Source: MDPI journal article supplement (doi:10.3390/jcm10091897), 2021-04-27
Supplement: s1 [file s1]

### QUESTIONNAIRE D'ÉVALUATION DU PROFIL SAISONNIER\*

|                                    | Pas de<br>changement | Changement<br>léger | Changement<br>modéré | Changement<br>prononcé | Changement<br>très prononcé |
|------------------------------------|----------------------|---------------------|----------------------|------------------------|-----------------------------|
| A. Durée du sommeil                | 0                    | 1                   | 2                    | 3                      | 4                           |
| B. Activité sociale                | 0                    | 1                   | 2                    | 3                      | 4                           |
| C. Humeur (sensation de bien-être) | 0                    | 1                   | 2                    | 3                      | 4                           |
| D. Poids                           | 0                    | 1                   | 2                    | 3                      | 4                           |
| E. Appétit                         | 0                    | 1                   | 2                    | 3                      | 4                           |
| F. Niveau d'énergie                | 0                    | 1                   | 2                    | 3                      | 4                           |

12. Pour les questions suivantes, remplissez les cercles lorsque la condition s'applique pour les mois concernés. Cela peut être un seul mois O, un groupe de mois, i.e O O O, ou toute autre combinaison de mois.

|                                   | JAN                   | FEB                   | MAR                   | AVR                   | MAI                   | JUN                   | JUIL                  | AOUT                  | SEPT                  | OCT                   | NOV                   | DEC                   | Ou<br>Pas de mois<br>particulier |
|-----------------------------------|-----------------------|-----------------------|-----------------------|-----------------------|-----------------------|-----------------------|-----------------------|-----------------------|-----------------------|-----------------------|-----------------------|-----------------------|----------------------------------|
| A quel moment de l'année ...      |                       |                       |                       |                       |                       |                       |                       |                       |                       |                       |                       |                       |                                  |
| A. Vous sentez-vous le mieux      | <input type="radio"/>            |
| B. Prenez vous le plus de poids   | <input type="radio"/>            |
| C. Êtes-vous le plus sociable     | <input type="radio"/>            |
| D. Dormez-vous le moins           | <input type="radio"/>            |
| E. Mangez-vous le plus            | <input type="radio"/>            |
| F. Perdez-vous le plus de poids   | <input type="radio"/>            |
| G. Êtes-vous le moins sociable    | <input type="radio"/>            |
| H. Vous sentez-vous le moins bien | <input type="radio"/>            |
| I. Mangez-vous le moins           | <input type="radio"/>            |
| J. Dormez-vous le plus            | <input type="radio"/>            |

13. De combien votre poids fluctue t'il au cours de l'année ?

|        |   |         |   |
|--------|---|---------|---|
| 0-2 kg | 1 | 6-8 kg  | 4 |
| 2-4 kg | 2 | 8-10 kg | 5 |
| 4-6 kg | 3 | > 10    | 6 |

14. Approximativement combien d'heures dormez-vous par journée de 24 heures pendant chaque saison ? (en incluant les siestes)

|           |   |   |   |   |   |   |   |   |   |   |    |    |    |    |    |    |    |    |    |            |
|-----------|---|---|---|---|---|---|---|---|---|---|----|----|----|----|----|----|----|----|----|------------|
| Hiver     | 0 | 1 | 2 | 3 | 4 | 5 | 6 | 7 | 8 | 9 | 10 | 11 | 12 | 13 | 14 | 15 | 16 | 17 | 18 | Plus de 18 |
| Printemps | 0 | 1 | 2 | 3 | 4 | 5 | 6 | 7 | 8 | 9 | 10 | 11 | 12 | 13 | 14 | 15 | 16 | 17 | 18 | Plus de 18 |
| Été       | 0 | 1 | 2 | 3 | 4 | 5 | 6 | 7 | 8 | 9 | 10 | 11 | 12 | 13 | 14 | 15 | 16 | 17 | 18 | Plus de 18 |
| Automne   | 0 | 1 | 2 | 3 | 4 | 5 | 6 | 7 | 8 | 9 | 10 | 11 | 12 | 13 | 14 | 15 | 16 | 17 | 18 | Plus de 18 |

15. Ressentez-vous une modification de vos préférences alimentaires selon les différentes saisons ?

|     |   |     |   |                    |
|-----|---|-----|---|--------------------|
| Non | 1 | Oui | 2 | Si oui, précisez : |
|-----|---|-----|---|--------------------|

16. Si vous ressentez des changements avec les saisons, estimez-vous qu'ils sont un problème pour vous ?

|     |   |     |   |                                 |   |
|-----|---|-----|---|---------------------------------|---|
| Non | 1 | Oui | 2 | Si oui, ce problème est : Léger | 1 |
|     |   |     |   | Modéré                          | 2 |
|     |   |     |   | Marqué                          | 3 |
|     |   |     |   | Sévère                          | 4 |
|     |   |     |   | Handicapant                     | 5 |

## SEASONAL PATTERN ASSESSMENT QUESTIONNAIRE

1. Name \_\_\_\_\_ 2. Age \_\_\_\_\_

**3. Place of birth – City / Province (State) / Country** \_\_\_\_\_

4. Today's date      \_\_\_\_\_

Month                  Day                  Year

5. Current weight (in lbs.) \_\_\_\_\_

**6. Years of education**                      **Less than four years of high school**   **1**

|                  |   |
|------------------|---|
| High school only | 2 |
|------------------|---|

**1 – 3 years post high school** **3**

4 or more years post high school 4

**7. Sex**                      **Male**            **1**            **Female**            **2**

|                   |        |   |
|-------------------|--------|---|
| 8. Marital Status | Single | 1 |
|-------------------|--------|---|

|         |   |
|---------|---|
| Married | 2 |
|---------|---|

**Separated/Divorced 3**

|         |   |
|---------|---|
| Widowed | 4 |
|---------|---|

**9. Occupation** \_\_\_\_\_

10. How many years have you lived in this climatic area? \_\_\_\_\_

## INSTRUCTIONS

**\* Please circle the number beside your choice**

**Example:**

|     |      |   |        |   |
|-----|------|---|--------|---|
| Sex | Male | 1 | Female | 2 |
|-----|------|---|--------|---|

**The purpose of this for is to find out how your mood and behaviour change over time. Please fill in all the relevant circles. Note: We are interested in your experience; not others you may have observed**

**11. To what degree do the following change with the seasons?**

|                                        | No change | Slight change | Moderate change | Marked change | Extremely marked change |
|----------------------------------------|-----------|---------------|-----------------|---------------|-------------------------|
| A. Sleep length                        | 0         | 1             | 2               | 3             | 4                       |
| B. Social activity                     | 0         | 1             | 2               | 3             | 4                       |
| C. Mood (overall feeling of wellbeing) | 0         | 1             | 2               | 3             | 4                       |
| D. Weight                              | 0         | 1             | 2               | 3             | 4                       |
| E. Appetite                            | 0         | 1             | 2               | 3             | 4                       |
| F. Energy Level                        | 0         | 1             | 2               | 3             | 4                       |

12. In the following questions, fill in circles for all applicable months. This may be a single month, O, a cluster of months, e.g. O O, or any other grouping.

At what time of the year do you...

|                     | JAN                   | FEB                   | MAR                   | APR                   | MAY                   | JUN                   | JUL                   | AUG                   | SEP                   | OCT                   | NOV                   | DEC                   | OR | No particular month stand out as extreme |
|---------------------|-----------------------|-----------------------|-----------------------|-----------------------|-----------------------|-----------------------|-----------------------|-----------------------|-----------------------|-----------------------|-----------------------|-----------------------|----|------------------------------------------|
| A. Feel best        | <input type="radio"/> |    | <input type="radio"/>                    |
| B. Gain most weight | <input type="radio"/> |    | <input type="radio"/>                    |
| C. Socialize most   | <input type="radio"/> |    | <input type="radio"/>                    |
| D. Sleep least      | <input type="radio"/> |    | <input type="radio"/>                    |
| E. Eat most         | <input type="radio"/> |    | <input type="radio"/>                    |
| F. Lose most weight | <input type="radio"/> |    | <input type="radio"/>                    |
| G. Socialize least  | <input type="radio"/> |    | <input type="radio"/>                    |
| H. Feel worst       | <input type="radio"/> |    | <input type="radio"/>                    |
| I. Eat least        | <input type="radio"/> |    | <input type="radio"/>                    |
| J. Sleep most       | <input type="radio"/> |    | <input type="radio"/>                    |

13. How much does your weight fluctuate during the course of the year?

|          |   |           |   |
|----------|---|-----------|---|
| 0-3 lbs  | 1 | 12-15 lbs | 4 |
| 4-7 lbs  | 2 | 16-20 lbs | 5 |
| 8-11 lbs | 3 | > 20 lbs  | 6 |

14. Approximately how many hours of each 24-hour day do you sleep during each season? (Include naps)

|        |   |   |   |   |   |   |   |   |   |   |    |    |    |    |    |    |    |    |    |         |
|--------|---|---|---|---|---|---|---|---|---|---|----|----|----|----|----|----|----|----|----|---------|
| Winter | 0 | 1 | 2 | 3 | 4 | 5 | 6 | 7 | 8 | 9 | 10 | 11 | 12 | 13 | 14 | 15 | 16 | 17 | 18 | Over 18 |
| Spring | 0 | 1 | 2 | 3 | 4 | 5 | 6 | 7 | 8 | 9 | 10 | 11 | 12 | 13 | 14 | 15 | 16 | 17 | 18 | Over 18 |
| Summer | 0 | 1 | 2 | 3 | 4 | 5 | 6 | 7 | 8 | 9 | 10 | 11 | 12 | 13 | 14 | 15 | 16 | 17 | 18 | Over 18 |
| Fall   | 0 | 1 | 2 | 3 | 4 | 5 | 6 | 7 | 8 | 9 | 10 | 11 | 12 | 13 | 14 | 15 | 16 | 17 | 18 | Over 18 |

15. Do you notice a change in food preference during the different seasons?

No 1      Yes 2      If yes, please specify:

16. If you experience changes with the seasons, do you feel that these are a problem for you?

No 1      Yes 2      If yes, is this problem -

|           |   |
|-----------|---|
| Mild      | 1 |
| Moderate  | 2 |
| Marked    | 3 |
| Severe    | 4 |
| Disabling | 5 |
